# Supplementary material
Source: publisher site journal article supplement (https://www.dovepress.com/article/402348)
Supplement: Supplementary file 1 [file get_supplementary_file.php]

**Appendix 1 - Questionnaire**

Respondent’s name: _________________________ Date __/__/____

**PATHOLOGY MANAGERS QUESTIONNAIRE**

**At your facility/department, what models of multidisciplinarity are present?**

| **Type** | **Name** | **Disease phase** | **Years since establishment** |
| --- | --- | --- | --- |
| 🞐 **Multidisciplinary Visits** | ____________________ | 🞐 Diagnostics  🞐 Pre-surgical  🞐 Post-surgical  🞐 Locally advanced / Metastatic  🞐 Other (_______________) | ______________ |
| 🞐 **Tumor Board** | ____________________ | 🞐 Diagnostics  🞐 Pre-surgical  🞐 Post-surgical  🞐 Locally advanced / Metastatic  🞐 Other (_______________) | ______________ |
| 🞐 None |  |  |  |

**(FROM HERE ON, PROPOSE EACH QUESTION FOR EACH MDTW MENTIONED BY THE RESPONDENT)**

**Description of the aims: ______________________________________________________________**

**Profession Coordinator:**

| 🞐 Surgeon |
| --- |
| 🞐 Oncologist |
| 🞐 Nurse |
| 🞐 Not predefined |
| 🞐 Other (specify_________________________________) |

**Permanent professionals:**

| 🞐 Oncologist |
| --- |
| 🞐 Surgeon |
| 🞐 Radiotherapist |
| 🞐 Pathologist |
| 🞐 Radiologist |
| 🞐 Palliativist |
| 🞐 Psychologist |
| 🞐 Case manager – profession: 🞐 Nurse  🞐 Administrative  🞐 Other (specify ____________________) |
| 🞐 Clinical Nurse |
| 🞐 Other (specify_________________________________) |

**Frequency of the meetings:**

| 🞐 Twice a week |
| --- |
| 🞐 Once a week |
| 🞐 From 1 time every 10 days to 1 time a month |
| 🞐 Whenever needed |

**Referral criteria**: ____________________________________________________________________________

**Recommended documentation for the visit:**

| 🞐 Imaging |
| --- |
| 🞐 Recent blood tests |
| 🞐 Histological examinations |
| 🞐 Variable depending on the case |

**Reporting documentation:**

| 🞐 On institutional registers |
| --- |
| 🞐 Not on institutional records |

**Use of PROMs:**

| 🞐 Yes |
| --- |
| 🞐 No |

**Inclusion in a formalized/institutional care pathway:**

| 🞐 Yes |
| --- |
| 🞐 No |

**Do you deem it useful for professional involved in MDTW to undergo a specific training on multidisciplinary working?**

| 🞐 Yes |
| --- |
| 🞐 No |

**What aspects, in your opinion, should training deal with?**

____________________________________________________________________________

____________________________________________________________________________

**Appendix 2 - List of MTDWs present in INT**

| **List of MDTWs** | **Kind of MDTWs** |
| --- | --- |
| 1. Advanced breast that needs reevaluation | MDCC |
| 1. Breast tumors | MDTM |
| 1. Colon rectal tumors | MDTM |
| 1. Colon rectal tumors | MDCC |
| 1. Eyelid orbit melanoma | MDCC |
| 1. Genitourinary tumors | MDTM |
| 1. Gynecology (post-surgical) | MDTM |
| 1. Gynecology (pre-surgical) | MDTM |
| 1. Hematology | MDTM |
| 1. Hereditary tumors of the digestive system | MDTM |
| 1. Home visits | MDTM |
| 1. Hospice | MDTM |
| 1. Home palliative assistance | MDCC |
| 1. Liver transplantation | MDTM |
| 1. Lung tumors (CAT) - to be diagnosed | MDCC |
| 1. Lung tumors (Management of complex patients) | MDTM |
| 1. Lung tumors (Stage III) | MDCC |
| 1. Maxillofacial and head and neck tumors | MDCC |
| 1. Maxillofacial and head and neck tumors | MDTM |
| 1. Melanoma and skin cancers | MDTM |
| 1. Metastatic breast | MDCC |
| 1. Metastatic Uveal melanoma | MDCC |
| 1. Molecular Tumor Board | MDTM |
| 1. Neuroendocrine tumors | MDTM |
| 1. Pathological anatomy | MDTM |
| 1. Pediatric Neuro-oncology | MDTM |
| 1. Pediatrics (No tumor-specific) | MDTM |
| 1. Post-operative surgical breast | MDCC |
| 1. Primary liver tumors | MDTM |
| 1. Prostate tumors | MDCC |
| 1. Prostate tumors | MDTM |
| 1. Sarcomas | MDCC |
| 1. Sarcomas | MDTM |
| 1. Terminal management of the pediatric patient | MDTM |
| 1. Thymus tumors | MDCC |
| 1. Thyroid tumors | MDTM |
| 1. Tumors of the pancreas and biliary tract (NET) | MDTM |
| 1. Tumors of the stomach and esophagus | MDTM |

**Notes:** MDTW = Multidisciplinary team working; MDTM = Multidisciplinary Team Meetings; MDCC = Multidisciplinary Cancer Clinics.
